# Supplementary material
Source: PubMed Central journal article supplement (PMC6207146)
Supplement: Supp_Table1.pdf [file Supp_Table1.pdf]

## Supplementary Data

SUPPLEMENTARY TABLE S1. FUNCTIONAL CONNECTIVITY OF THE EXECUTIVE FUNCTIONS NETWORK AND READING-RELATED REGIONS (SUPPORTING COGNITIVE ABILITY) IN CHILDREN WITH READING DIFFICULTIES AND TYPICAL READERS, AND THE DIFFERENCE BETWEEN THE TWO READING GROUPS

| <i>Condition</i> | <i>Cognitive ability</i>           | <i>Target BA (ROI)</i> | <i>Regions</i>            | <i>T</i>                                  | <i>p value (p &lt; 0.05 FDR corrected)</i> |                                   |       |          |
|------------------|------------------------------------|------------------------|---------------------------|-------------------------------------------|--------------------------------------------|-----------------------------------|-------|----------|
| Typical readers  | Visual                             | L BA 19                | Associative visual cortex | 12.23                                     | 0.000000                                   |                                   |       |          |
|                  |                                    | R BA 19                | Associative visual cortex | 6.90                                      | 0.000001                                   |                                   |       |          |
|                  |                                    | L BA 18                | Secondary visual cortex   | 9.68                                      | 0.000000                                   |                                   |       |          |
|                  |                                    | R BA 18                | Secondary visual cortex   | 6.41                                      | 0.000002                                   |                                   |       |          |
|                  |                                    | R BA 17                | Primary visual cortex     | 3.98                                      | 0.000670                                   |                                   |       |          |
|                  |                                    | L BA 17                | Primary visual cortex     | 3.72                                      | 0.001243                                   |                                   |       |          |
|                  | Language                           |                        | L BA 44                   | Inferior frontal cortex pars opercularis  | 17.72                                      | 0.000000                          |       |          |
|                  |                                    |                        | R BA 44                   | Inferior frontal cortex pars opercularis  | 14.34                                      | 0.000000                          |       |          |
|                  |                                    |                        | R BA 40                   | Supramarginal gyrus                       | 15.06                                      | 0.000000                          |       |          |
|                  |                                    |                        | L BA 40                   | Supramarginal gyrus                       | 14.61                                      | 0.000000                          |       |          |
|                  |                                    |                        | L BA 7                    | Somatosensory association cortex          | 12.16                                      | 0.000000                          |       |          |
|                  |                                    |                        | R BA 7                    | Somatosensory association cortex          | 9.0                                        | 0.000000                          |       |          |
|                  |                                    |                        | L BA 22                   | Superior temporal gyrus                   | 12.12                                      | 0.000000                          |       |          |
|                  |                                    |                        | R BA 22                   | Superior temporal gyrus                   | 8.63                                       | 0.000000                          |       |          |
|                  |                                    |                        | L BA 45                   | Inferior frontal cortex pars triangularis | 10.8                                       | 0.000000                          |       |          |
|                  |                                    |                        | R BA 45                   | Inferior frontal cortex pars triangularis | 11.17                                      | 0.000000                          |       |          |
|                  |                                    |                        | R BA 47                   | Inferior prefrontal gyrus                 | 10.32                                      | 0.000000                          |       |          |
|                  |                                    |                        | L BA 47                   | Inferior prefrontal gyrus                 | 8.88                                       | 0.000000                          |       |          |
|                  |                                    |                        | L BA 41                   | Primary auditory cortex                   | 8.65                                       | 0.000000                          |       |          |
|                  |                                    |                        | R BA 41                   | Primary auditory cortex                   | 5.77                                       | 0.000009                          |       |          |
|                  |                                    |                        | L BA 42                   | Primary auditory cortex                   | 8.28                                       | 0.000000                          |       |          |
|                  |                                    |                        | R BA 42                   | Primary auditory cortex                   | 4.9                                        | 0.000075                          |       |          |
|                  |                                    |                        | L BA 39                   | Angular gyrus                             | 7.52                                       | 0.000000                          |       |          |
|                  |                                    |                        | R BA 39                   | Angular gyrus                             | 6.36                                       | 0.000002                          |       |          |
|                  |                                    |                        | L BA 21                   | Middle temporal gyrus                     | 4.28                                       | 0.000329                          |       |          |
|                  |                                    |                        | R BA 21                   | Middle temporal gyrus                     | 4.77                                       | 0.000102                          |       |          |
|                  |                                    |                        | L BA 13                   | Insular cortex                            | 17.14                                      | 0.000000                          |       |          |
|                  |                                    |                        | R BA 13                   | Insular cortex                            | 18.95                                      | 0.000000                          |       |          |
|                  |                                    |                        | L BA 20                   | Inferior temporal gyrus                   | 4.97                                       | 0.000064                          |       |          |
|                  |                                    |                        | R BA 20                   | Inferior temporal gyrus                   | 4.17                                       | 0.000428                          |       |          |
|                  |                                    |                        | L BA 37                   | Fusiform gyrus                            | 6.79                                       | 0.000001                          |       |          |
|                  |                                    |                        | R BA 37                   | Fusiform gyrus                            | 4.3                                        | 0.000321                          |       |          |
|                  |                                    |                        | Cognitive control         |                                           | R BA 9                                     | Dorsolateral prefrontal cortex    | 18.28 | 0.000000 |
|                  |                                    |                        |                           |                                           | L BA 9                                     | Dorsolateral prefrontal cortex    | 17.5  | 0.000000 |
|                  |                                    |                        |                           |                                           | L BA 24                                    | Ventral anterior cingulate cortex | 15.47 | 0.000000 |
|                  |                                    |                        |                           |                                           | R BA 24                                    | Ventral anterior cingulate cortex | 11.81 | 0.000000 |
|                  |                                    |                        |                           |                                           | L BA 46                                    | Dorsolateral prefrontal cortex    | 16.11 | 0.000000 |
|                  |                                    |                        |                           |                                           | R BA 46                                    | Dorsolateral prefrontal cortex    | 13.33 | 0.000000 |
|                  |                                    |                        |                           |                                           | L BA 32                                    | Dorsal anterior cingulate cortex  | 11.78 | 0.000000 |
|                  |                                    |                        |                           |                                           | R BA 32                                    | Dorsal anterior cingulate cortex  | 10.45 | 0.000000 |
|                  |                                    |                        |                           |                                           | L BA 8                                     | Dorsal frontal cortex             | 8.87  | 0.000000 |
|                  |                                    |                        |                           |                                           | R BA 8                                     | Dorsal frontal cortex             | 11.22 | 0.000000 |
| L BA 10          | Anterior prefrontal cortex         | 9.47                   |                           |                                           | 0.000000                                   |                                   |       |          |
| R BA 10          | Anterior prefrontal cortex         | 8.58                   |                           |                                           | 0.000000                                   |                                   |       |          |
| L BA 2           | Primary somatosensory cortex       | 9.16                   |                           |                                           | 0.000000                                   |                                   |       |          |
| R BA 2           | Primary somatosensory cortex       | 7.19                   |                           |                                           | 0.000000                                   |                                   |       |          |
| L BA 23          | Ventral posterior cingulate cortex | 6.8                    |                           |                                           | 0.000001                                   |                                   |       |          |
| R BA 23          | Ventral posterior cingulate cortex | 5.78                   |                           |                                           | 0.000009                                   |                                   |       |          |
| L BA 30          | Cingulate cortex                   | 3.7                    |                           |                                           | 0.001307                                   |                                   |       |          |
| R BA 30          | Cingulate cortex                   | 3.25                   |                           |                                           | 0.003898                                   |                                   |       |          |
| L BA 31          | Dorsal posterior cingulate cortex  | 6.53                   |                           |                                           | 0.000002                                   |                                   |       |          |
| R BA 31          | Dorsal posterior cingulate cortex  | 5.87                   |                           |                                           | 0.000007                                   |                                   |       |          |
| L BA 33          | Anterior cingulate cortex          | 5.13                   | 0.000044                  |                                           |                                            |                                   |       |          |

(continued)

SUPPLEMENTARY TABLE S1. (CONTINUED)

| <i>Condition</i> | <i>Cognitive ability</i> | <i>Target BA (ROI)</i> | <i>Regions</i>                            | <i>T</i> | <i>p value (p &lt; 0.05 FDR corrected)</i> |
|------------------|--------------------------|------------------------|-------------------------------------------|----------|--------------------------------------------|
|                  |                          | R BA 33                | Anterior cingulate cortex                 | 4.92     | 0.000072                                   |
|                  |                          | L BA 6                 | Premotor cortex                           | 15.18    | 0.000000                                   |
|                  |                          | R BA 6                 | Premotor cortex                           | 13.53    | 0.000000                                   |
|                  |                          | L BA 4                 | Primary motor cortex                      | 9.72     | 0.000000                                   |
|                  |                          | R BA 4                 | Primary motor cortex                      | 6.41     | 0.000002                                   |
|                  |                          | L BA 5                 | Somatosensory association cortex          | 8.86     | 0.000000                                   |
|                  |                          | R BA 5                 | Somatosensory association cortex          | 6.94     | 0.000001                                   |
|                  |                          | L BA 3                 | Primary somatosensory cortex              | 6.19     | 0.000003                                   |
|                  |                          | R BA 3                 | Primary somatosensory cortex              | 4.82     | 0.000090                                   |
|                  |                          | L BA 28                | Posterior entorhinal cortex               | 4.62     | 0.000147                                   |
|                  |                          | R BA 28                | Posterior entorhinal cortex               | 2.8      | 0.010826                                   |
|                  |                          | L BA 34                | Anterior entorhinal cortex                | 4.59     | 0.000157                                   |
|                  |                          | R BA 34                | Anterior entorhinal cortex                | 3.98     | 0.000670                                   |
|                  |                          | L BA 43                | Subcentral area                           | 4.31     | 0.000320                                   |
|                  |                          | R BA 43                | Subcentral area                           | 5.81     | 0.000008                                   |
|                  |                          | L BA 38                | Temporopolar area                         | 3.49     | 0.002167                                   |
|                  |                          | R BA 38                | Temporopolar area                         | 4.13     | 0.000474                                   |
|                  |                          | L BA 36                | Parahippocampal cortex                    | 3.11     | 0.005449                                   |
|                  |                          | R BA 36                | Parahippocampal cortex                    | 3.75     | 0.001175                                   |
|                  |                          | L BA 1                 | Primary somatosensory cortex              | 2.12     | 0.047975                                   |
|                  |                          | R BA 1                 | Primary somatosensory cortex              | 3.8      | 0.001046                                   |
|                  |                          | L BA 29                | Retrosplenial cingulate cortex            | 3.07     | 0.005937                                   |
|                  |                          | R BA 29                | Retrosplenial cingulate cortex            | 2.27     | 0.035182                                   |
|                  |                          | L BA 11                | Orbitofrontal cortex                      | 2.84     | 0.010096                                   |
| Children with RD | Visual                   | L BA 19                | Associative visual cortex                 | 9.53     | 0.000000                                   |
|                  |                          | R BA 19                | Associative visual cortex                 | 7.58     | 0.000002                                   |
|                  |                          | L BA 18                | Secondary visual cortex                   | 6.52     | 0.000008                                   |
|                  |                          | R BA 18                | Secondary visual cortex                   | 7.57     | 0.000001                                   |
|                  |                          | R BA 17                | Primary visual cortex                     | 4.11     | 0.000909                                   |
|                  |                          | L BA 17                | Primary visual cortex                     | 4.56     | 0.000368                                   |
|                  | Language                 | L BA 44                | Inferior frontal cortex pars opercularis  | 9.71     | 0.000000                                   |
|                  |                          | R BA 44                | Inferior frontal cortex pars opercularis  | 8.73     | 0.000000                                   |
|                  |                          | R BA 40                | Supramarginal gyrus                       | 11.62    | 0.000000                                   |
|                  |                          | L BA 40                | Supramarginal gyrus                       | 14.45    | 0.000000                                   |
|                  |                          | L BA 7                 | Somatosensory association cortex          | 12.12    | 0.000000                                   |
|                  |                          | R BA 7                 | Somatosensory association cortex          | 10.23    | 0.000000                                   |
|                  |                          | L BA 22                | Superior temporal gyrus                   | 6.76     | 0.000006                                   |
|                  |                          | R BA 22                | Superior temporal gyrus                   | 6.58     | 0.000007                                   |
|                  |                          | L BA 45                | Inferior frontal cortex pars triangularis | 6.69     | 0.000007                                   |
|                  |                          | R BA 45                | Inferior frontal cortex pars triangularis | 6.42     | 0.000010                                   |
|                  |                          | R BA 47                | Inferior prefrontal gyrus                 | 8.24     | 0.000001                                   |
|                  |                          | L BA 47                | Inferior prefrontal gyrus                 | 5.41     | 0.000065                                   |
|                  |                          | L BA 41                | Primary auditory cortex                   | 6.06     | 0.000018                                   |
|                  |                          | R BA 41                | Primary auditory cortex                   | 4.48     | 0.000428                                   |
|                  |                          | L BA 42                | Primary auditory cortex                   | 6.59     | 0.000007                                   |
|                  |                          | R BA 42                | Primary auditory cortex                   | 5.21     | 0.000096                                   |
|                  |                          | L BA 39                | Angular gyrus                             | 7.87     | 0.000001                                   |
|                  |                          | R BA 39                | Angular gyrus                             | 7.18     | 0.000003                                   |
|                  |                          | L BA 21                | Middle temporal gyrus                     | 5.94     | 0.000023                                   |
|                  |                          | R BA 21                | Middle temporal gyrus                     | 6.93     | 0.000005                                   |
|                  |                          | L BA 13                | Insular cortex                            | 9.46     | 0.000000                                   |
|                  |                          | R BA 13                | Insular cortex                            | 10.17    | 0.000000                                   |
|                  |                          | L BA 20                | Inferior temporal gyrus                   | 3.48     | 0.003218                                   |
|                  |                          | R BA 20                | Inferior temporal gyrus                   | 4.30     | 0.000597                                   |
|                  |                          | L BA 37                | Fusiform gyrus                            | 6.70     | 0.000007                                   |
|                  |                          | R BA 37                | Fusiform gyrus                            | 6.38     | 0.000010                                   |
|                  | Cognitive control        | R BA 9                 | Dorsolateral prefrontal cortex            | 12.76    | 0.000000                                   |
|                  |                          | L BA 9                 | Dorsolateral prefrontal cortex            | 11.85    | 0.000000                                   |
|                  |                          | L BA 24                | Ventral anterior cingulate cortex         | 9.13     | 0.000000                                   |
|                  |                          | R BA 24                | Ventral anterior cingulate cortex         | 7.74     | 0.000001                                   |

(continued)

SUPPLEMENTARY TABLE S1. (CONTINUED)

| <i>Condition</i>              | <i>Cognitive ability</i> | <i>Target BA (ROI)</i> | <i>Regions</i>                     | <i>T</i> | <i>p value (p &lt; 0.05 FDR corrected)</i> |
|-------------------------------|--------------------------|------------------------|------------------------------------|----------|--------------------------------------------|
|                               |                          | L BA 46                | Dorsolateral prefrontal cortex     | 11.28    | 0.000000                                   |
|                               |                          | R BA 46                | Dorsolateral prefrontal cortex     | 6.68     | 0.000007                                   |
|                               |                          | L BA 32                | Dorsal anterior cingulate cortex   | 10.6     | 0.000000                                   |
|                               |                          | R BA 32                | Dorsal anterior cingulate cortex   | 9.84     | 0.000000                                   |
|                               |                          | L BA 8                 | Dorsal frontal cortex              | 11.09    | 0.000000                                   |
|                               |                          | R BA 8                 | Dorsal frontal cortex              | 11.55    | 0.000000                                   |
|                               |                          | L BA 10                | Anterior prefrontal cortex         | 6.03     | 0.000019                                   |
|                               |                          | R BA 10                | Anterior prefrontal cortex         | 6.63     | 0.000007                                   |
|                               |                          | L BA 2                 | Primary somatosensory cortex       | 8.89     | 0.000000                                   |
|                               |                          | R BA 2                 | Primary somatosensory cortex       | 6.7      | 0.000007                                   |
|                               |                          | L BA 23                | Ventral posterior cingulate cortex | 5.44     | 0.000063                                   |
|                               |                          | R BA 23                | Ventral posterior cingulate cortex | 5.0      | 0.000143                                   |
|                               |                          | L BA 30                | Cingulate cortex                   | 4.33     | 0.000573                                   |
|                               |                          | R BA 30                | Cingulate cortex                   | 4.73     | 0.000253                                   |
|                               |                          | L BA 31                | Dorsal posterior cingulate cortex  | 7.4      | 0.000002                                   |
|                               |                          | R BA 31                | Dorsal posterior cingulate cortex  | 7.65     | 0.000001                                   |
|                               |                          | L BA 33                | Anterior cingulate cortex          | 3.6      | 0.002567                                   |
|                               |                          | L BA 29                | Retrosplenial cingulate cortex     | 3.58     | 0.002639                                   |
|                               |                          | R BA 29                | Retrosplenial cingulate cortex     | 4.05     | 0.001028                                   |
|                               |                          | L BA 6                 | Premotor cortex                    | 11.67    | 0.000000                                   |
|                               |                          | R BA 6                 | Premotor cortex                    | 10.54    | 0.000000                                   |
|                               |                          | L BA 4                 | Primary motor cortex               | 6.37     | 0.000010                                   |
|                               |                          | R BA 4                 | Primary motor cortex               | 5.52     | 0.000053                                   |
|                               |                          | L BA 5                 | Somatosensory association cortex   | 6.7      | 0.000007                                   |
|                               |                          | R BA 5                 | Somatosensory association cortex   | 7.72     | 0.000001                                   |
|                               |                          | L BA 3                 | Primary somatosensory cortex       | 5.22     | 0.000095                                   |
|                               |                          | R BA 3                 | Primary somatosensory cortex       | 5.19     | 0.000098                                   |
|                               |                          | L BA 28                | Posterior entorhinal cortex        | 2.33     | 0.034307                                   |
|                               |                          | R BA 28                | Posterior entorhinal cortex        | 3.54     | 0.002867                                   |
|                               |                          | L BA 34                | Anterior entorhinal cortex         | 2.38     | 0.030894                                   |
|                               |                          | R BA 34                | Anterior entorhinal cortex         | 3.1      | 0.007368                                   |
|                               |                          | L BA 43                | Subcentral area                    | 3.75     | 0.001914                                   |
|                               |                          | R BA 43                | Subcentral area                    | 6.87     | 0.000005                                   |
|                               |                          | L BA 38                | Temporopolar area                  | 2.96     | 0.009723                                   |
|                               |                          | R BA 38                | Temporopolar area                  | 3.72     | 0.002019                                   |
|                               |                          | L BA 36                | Parahippocampal cortex             | 2.88     | 0.011552                                   |
|                               |                          | R BA 36                | Parahippocampal cortex             | 4.34     | 0.000573                                   |
|                               |                          | L BA 1                 | Primary somatosensory cortex       | 3.96     | 0.001213                                   |
|                               |                          | R BA 1                 | Primary somatosensory cortex       | 2.82     | 0.012935                                   |
|                               |                          | L BA 35                | Perirhinal cortex                  | 2.72     | 0.015581                                   |
|                               |                          | R BA 35                | Perirhinal cortex                  | 3.64     | 0.002362                                   |
|                               |                          | R BA 27                | Piriform cortex                    | 2.46     | 0.026690                                   |
| Contrast RD > TR <sup>a</sup> | Visual                   | R BA 18                | Secondary visual cortex            | -3.47    | 0.035179                                   |
|                               |                          | R BA 19                | Associative visual cortex          | -3.27    | 0.043536                                   |
|                               |                          | L BA 19                | Associative visual cortex          | -2.88    | 0.043536                                   |
|                               | Language                 | L BA 7                 | Somatosensory associated cortex    | -3.06    | 0.043536                                   |
|                               |                          | R BA 21                | Middle temporal gyrus              | -2.95    | 0.043536                                   |
|                               |                          | L BA 39                | Angular gyrus                      | -2.91    | 0.043536                                   |
|                               | Cognitive control        | L BA 31                | Dorsal posterior cingulate cortex  | 3.55     | 0.035179                                   |
|                               |                          | L BA 2                 | Primary somatosensory cortex       | -3.45    | 0.035179                                   |
|                               |                          | R BA 9                 | Dorsolateral prefrontal cortex     | -3.10    | 0.043536                                   |
|                               |                          | R BA 35                | Perirhinal cortex                  | -2.99    | 0.043536                                   |
|                               |                          | R BA 43                | Subcentral area                    | -2.96    | 0.043536                                   |
|                               |                          | L BA 8                 | Dorsal frontal cortex              | -2.88    | 0.043536                                   |
|                               |                          | R BA 31                | Dorsal posterior cingulate cortex  | -2.83    | 0.045220                                   |
|                               |                          | R BA 30                | Cingulate cortex                   | -2.76    | 0.050516                                   |

<sup>a</sup>The opposite contrast (TR > RD) resulted in nonsignificant results.

BA, Brodmann area; FDR, false discovery rate; RD, children with reading difficulties; ROI, regions of interest; TR, typical readers.
